# Supplementary material
Source: PubMed Central journal article supplement (PMC3553899)
Supplement: JCM.02620-12_zjm999092273so1.pdf [file JCM.02620-12_zjm999092273so1.pdf]

**Supplemental Table S1.** Regression Model Equations for Fitted Lines Shown in Figure 1.

| Figure | Assay & Standard   | Fitted Model Equation | Adjusted R-square |
|--------|--------------------|-----------------------|-------------------|
| 1A     | ddPCR & Acrometrix | $Y=0.985*X+0.377$     | 0.986             |
| 1A     | ddPCR & NIST       | $Y=1.045*X+0.172$     | 0.994             |
| 1A     | ddPCR & WHO        | $Y=0.996*X+0.283$     | 0.997             |
| 1B     | RTPCR & Acrometrix | $Y=0.931*X+0.553$     | 0.976             |
| 1B     | RTPCR & NIST       | $Y=0.959*X+0.846$     | 0.995             |
| 1B     | RTPCR & WHO        | $Y=1.044*X-0.311$     | 0.992             |

**Supplemental Table S2.** Regression Model Equations for Fitted Lines Shown in Figure 2.

| Group      | Equation          | Adjusted R-square |
|------------|-------------------|-------------------|
| Acrometrix | $Y=0.952*X+0.159$ | 0.995             |
| NIST       | $Y=1.037*X$       | 0.986             |
| WHO        | $Y=1.033*X$       | 0.959             |

A

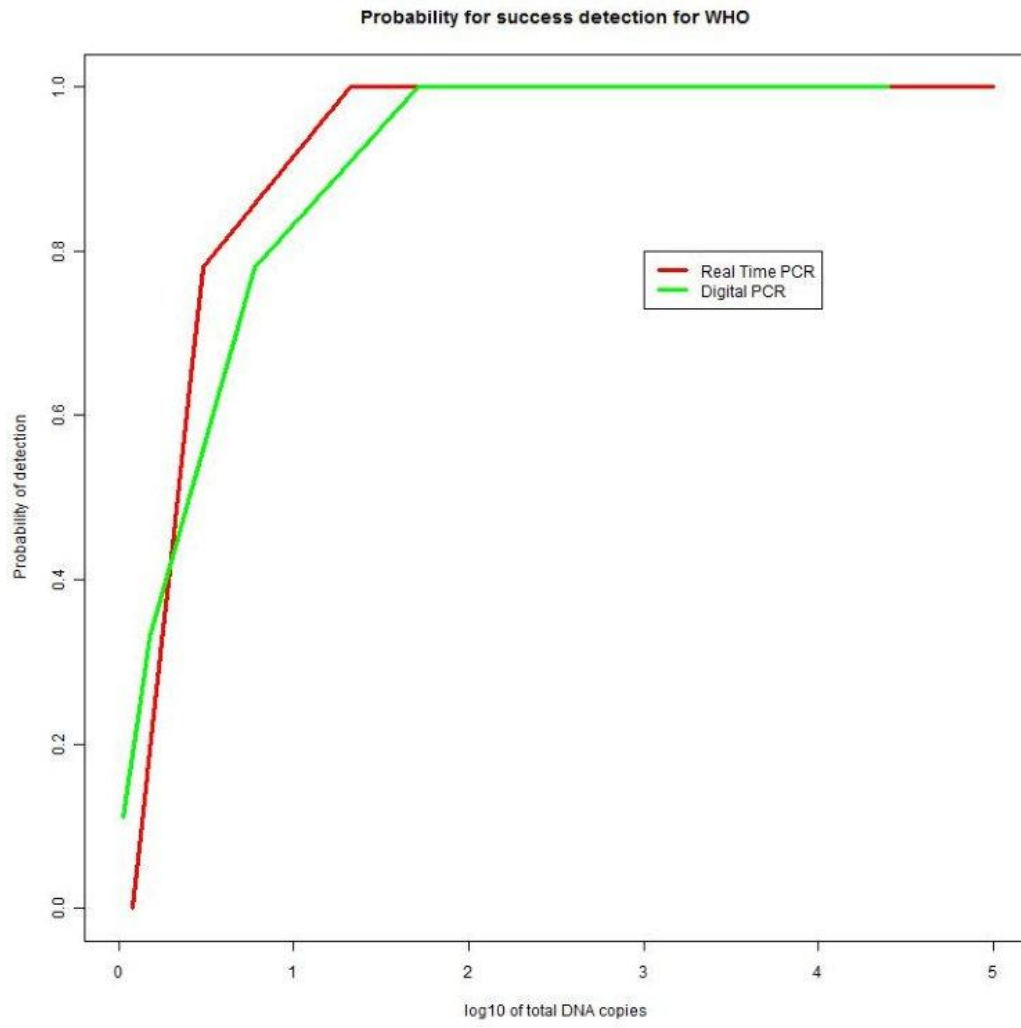

B

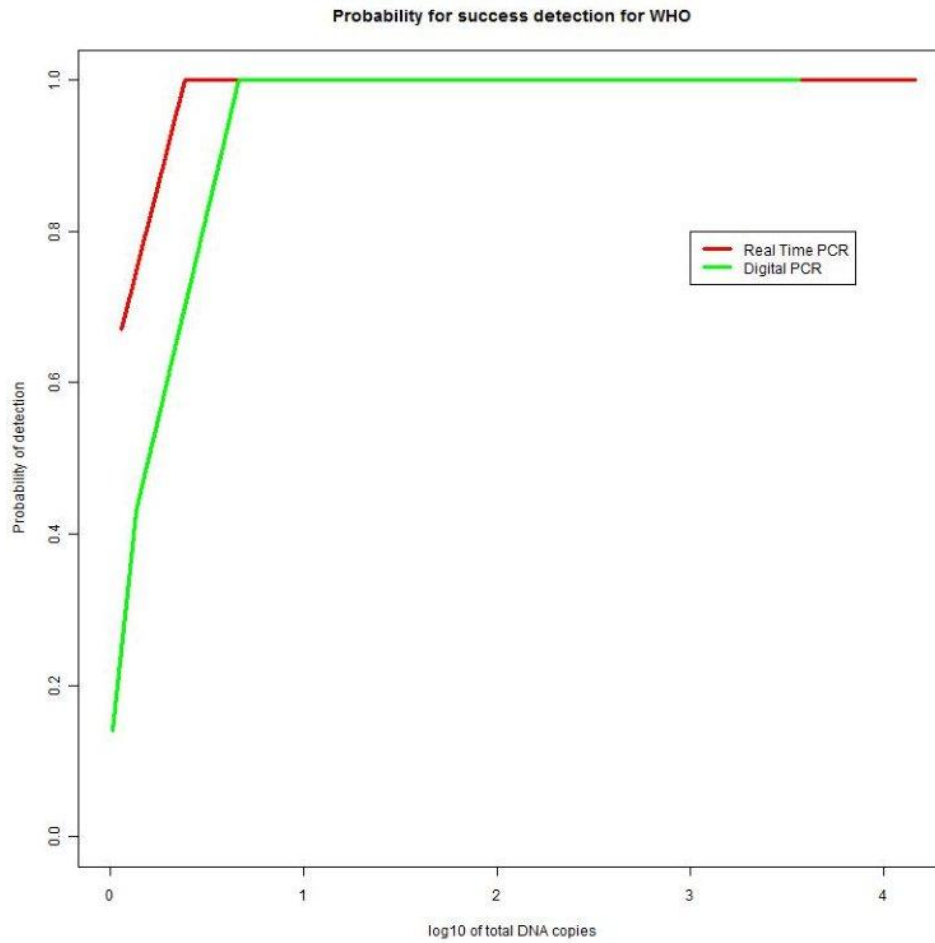

**Figure S1A.** Plot of the Observed Probability of Detection as a Function of the  $\log(\text{total input copies} + 1)$  for the (A) NIST standard and (B) WHO standard. There was not enough data to perform a meaningful formal comparison with logistic regression analysis.

**Supplement Table S3**

| <b>Specimen ID</b> | <b>Mean(digitalPCR)</b> | <b>Std(digitalPCR)</b> | <b>%CV(digitalPCR)</b> | <b>Mean(RealTime)</b> | <b>Std(RealTime)</b> | <b>%CV(RealTime)</b> |
|--------------------|-------------------------|------------------------|------------------------|-----------------------|----------------------|----------------------|
| 1                  | 0.57                    | 1.14                   | 200.000                | 1.06                  | 0.20                 | 18.693               |
| 2                  | 1.08                    | 1.26                   | 116.978                | 0.79                  | 0.94                 | 117.908              |
| 3                  | 1.11                    | 1.30                   | 117.623                | 1.97                  | 0.18                 | 9.043                |
| 4                  | 1.48                    | 0.99                   | 66.733                 | 1.63                  | 0.30                 | 18.170               |
| 5                  | 0.00                    | 0.00                   | n/a                    | 1.41                  | 0.12                 | 8.877                |
| 6                  | 1.95                    | 0.04                   | 2.107                  | 1.64                  | 0.25                 | 15.425               |
| 7                  | 0.99                    | 1.15                   | 115.567                | 1.57                  | 0.32                 | 20.130               |
| 8                  | 1.04                    | 1.20                   | 115.811                | 1.64                  | 0.34                 | 20.573               |
| 9                  | 1.06                    | 1.23                   | 115.661                | 1.87                  | 0.12                 | 6.581                |
| 10                 | 3.19                    | 0.10                   | 3.136                  | 3.46                  | 0.05                 | 1.418                |
| 11                 | 1.07                    | 1.24                   | 115.809                | 1.54                  | 0.48                 | 31.141               |
| 12                 | 2.17                    | 0.31                   | 14.093                 | 2.11                  | 0.29                 | 13.978               |
| 13                 | 2.25                    | 0.27                   | 12.174                 | 2.19                  | 0.20                 | 8.930                |
| 14                 | 2.11                    | 0.32                   | 15.019                 | 2.32                  | 0.11                 | 4.649                |
| 15                 | 2.41                    | 0.36                   | 14.823                 | 2.35                  | 0.17                 | 7.077                |
| 16                 | 2.54                    | 0.25                   | 9.853                  | 2.42                  | 0.39                 | 15.910               |
| 17                 | 1.66                    | 1.12                   | 67.722                 | 1.91                  | 0.29                 | 15.277               |
| 18                 | 2.20                    | 0.35                   | 16.017                 | 2.23                  | 0.20                 | 9.067                |
| 19                 | 1.24                    | 1.44                   | 115.766                | 1.86                  | 0.20                 | 10.898               |
| 20                 | 2.44                    | 0.05                   | 1.986                  | 2.55                  | 0.12                 | 4.868                |
| 21                 | 2.68                    | 0.21                   | 7.928                  | 2.80                  | 0.13                 | 4.766                |
| 22                 | 2.02                    | 0.15                   | 7.433                  | 1.85                  | 0.16                 | 8.784                |
| 23                 | 2.31                    | 0.38                   | 16.488                 | 2.47                  | 0.15                 | 5.924                |
| 24                 | 1.91                    | 1.27                   | 66.673                 | 1.94                  | 0.16                 | 8.427                |
| 25                 | 1.77                    | 1.19                   | 67.312                 | 2.54                  | 0.06                 | 2.455                |
| 26                 | 2.20                    | 0.26                   | 11.952                 | 2.40                  | 0.17                 | 7.115                |

| Specimen ID | Mean(digitalPCR) | Std(digitalPCR) | %CV(digitalPCR) | Mean(RealTime) | Std(RealTime) | %CV(RealTime) |
|-------------|------------------|-----------------|-----------------|----------------|---------------|---------------|
| 27          | 2.70             | 0.11            | 4.117           | 2.75           | 0.12          | 4.505         |
| 28          | 2.03             | 1.36            | 67.240          | 2.71           | 0.07          | 2.600         |
| 29          | 2.63             | 0.21            | 7.939           | 2.73           | 0.12          | 4.475         |
| 30          | 1.26             | 1.46            | 116.373         | 2.18           | 0.20          | 9.393         |
| 31          | 3.11             | 0.11            | 3.429           | 3.18           | 0.15          | 4.848         |
| 32          | 3.09             | 0.03            | 0.829           | 3.20           | 0.06          | 2.011         |
| 33          | 2.93             | 0.18            | 6.169           | 3.14           | 0.13          | 4.253         |
| 34          | 2.83             | 0.12            | 4.130           | 3.22           | 0.11          | 3.361         |
| 35          | 3.07             | 0.26            | 8.613           | 3.43           | 0.12          | 3.624         |
| 36          | 3.35             | 0.12            | 3.711           | 3.70           | 0.07          | 1.811         |
| 37          | 3.47             | 0.08            | 2.231           | 3.61           | 0.07          | 1.909         |
| 38          | 3.73             | 0.05            | 1.319           | 3.80           | 0.10          | 2.605         |
| 39          | 3.47             | 0.07            | 1.955           | 3.56           | 0.09          | 2.588         |
| 40          | 3.52             | 0.13            | 3.753           | 3.72           | 0.14          | 3.813         |
| 41          | 3.58             | 0.15            | 4.081           | 3.80           | 0.13          | 3.449         |
| 42          | 4.24             | 0.02            | 0.437           | 4.29           | 0.03          | 0.699         |
| 43          | 4.26             | 0.02            | 0.467           | 4.18           | 0.07          | 1.646         |
| 44          | 4.04             | 0.10            | 2.556           | 4.32           | 0.04          | 0.958         |
| 45          | 3.95             | 0.26            | 6.691           | 4.61           | 0.04          | 0.926         |
| 46          | 4.68             | 0.02            | 0.497           | 4.54           | 0.09          | 1.888         |
| 47          | 4.36             | 0.07            | 1.662           | 4.53           | 0.04          | 0.943         |
| 48          | 4.47             | 0.02            | 0.359           | 4.65           | 0.08          | 1.662         |
| 49          | 5.18             | 0.05            | 1.016           | 5.34           | 0.13          | 2.462         |
| 50          | 5.45             | 0.06            | 1.169           | 5.43           | 0.05          | 0.860         |
